# Supplementary material for: KLF14 targets ITGB1 to inhibit the progression of cervical cancer via the PI3K/AKT signalling pathway
Source: PubMed Central journal article supplement (PMC9108130; doi:10.1007/s12672-022-00494-1), 2022-05-16
Supplement: 12672_2022_494_MOESM1_ESM.pdf [file 12672_2022_494_MOESM1_ESM.pdf]

| Patient  | Operation Organ | Sex    | Age   | Pathological Type       | T    | N  | M  | Clinical Stage |
|----------|-----------------|--------|-------|-------------------------|------|----|----|----------------|
| J03A0309 | uterus          | female | 46    | squamous cell carcinoma | T1a1 | N0 | M0 | IA1            |
| J03A0306 | uterus          | female | 43    | squamous cell carcinoma | T1a2 | N0 | M0 | IA2            |
| J03A0215 | uterus          | female | adult | squamous cell carcinoma | T1b1 | N0 | M0 | IB1            |
| J03A0216 | uterus          | female | adult | squamous cell carcinoma | T1b1 | N0 | M0 | IB1            |
| J03A0223 | uterus          | female | adult | squamous cell carcinoma | T1b1 | N0 | M0 | IB1            |
| J03A0224 | uterus          | female | adult | squamous cell carcinoma | T1b1 | N0 | M0 | IB1            |
| J03A0225 | uterus          | female | adult | squamous cell carcinoma | T1b1 | N0 | M0 | IB1            |
| J03A0229 | uterus          | female | adult | squamous cell carcinoma | T1b1 | N0 | M0 | IB1            |
| J03A0230 | uterus          | female | adult | squamous cell carcinoma | T1b1 | N0 | M0 | IB1            |
| J03A0234 | uterus          | female | adult | squamous cell carcinoma | T1b1 | N0 | M0 | IB1            |
| J03A0236 | uterus          | female | adult | squamous cell carcinoma | T1b1 | N0 | M0 | IB1            |
| J03A0237 | uterus          | female | adult | squamous cell carcinoma | T1b1 | N0 | M0 | IB1            |
| J03A0238 | uterus          | female | adult | squamous cell carcinoma | T1b1 | N0 | M0 | IB1            |
| J03A0239 | uterus          | female | adult | squamous cell carcinoma | T1b1 | N0 | M0 | IB1            |
| J03A0241 | uterus          | female | adult | squamous cell carcinoma | T1b1 | N0 | M0 | IB1            |
| J03A0164 | uterus          | female | 54    | squamous cell carcinoma | T1b1 | N0 | M0 | IB1            |
| J03A0180 | uterus          | female | 54    | squamous cell carcinoma | T1b1 | N0 | M0 | IB1            |
| J03A0031 | uterus          | female | 60    | squamous cell carcinoma | T1b1 | N0 | M0 | IB1            |
| J03A0077 | uterus          | female | 56    | squamous cell carcinoma | T1b1 | N0 | M0 | IB1            |
| J03A0366 | uterus          | female | 52    | squamous cell carcinoma | T1b1 | N0 | M0 | IB1            |
| J03A0028 | uterus          | female | 65    | squamous cell carcinoma | T1b2 | N0 | M0 | IB2            |
| J03A0040 | uterus          | female | 48    | squamous cell carcinoma | T1b2 | N0 | M0 | IB2            |
| J03A0105 | uterus          | female | 57    | squamous cell carcinoma | T1b2 | N0 | M0 | IB2            |
| J03A0039 | uterus          | female | 29    | squamous cell carcinoma | T1b  | N0 | M0 | IB             |
| J03A0227 | uterus          | female | adult | squamous cell carcinoma | T1b  | N0 | M0 | IB             |
| J03A0041 | uterus          | female | 36    | squamous cell carcinoma | T1b  | N0 | M0 | IB             |
| J03A0067 | uterus          | female | 70    | squamous cell carcinoma | T1b  | N0 | M0 | IB             |
| J03A0074 | uterus          | female | 38    | squamous cell carcinoma | T1b  | N0 | M0 | IB             |
| J03A0075 | uterus          | female | 52    | squamous cell carcinoma | T1b  | N0 | M0 | IB             |
| J03A0085 | uterus          | female | 61    | squamous cell carcinoma | T1b  | N0 | M0 | IB             |
| J03A0098 | uterus          | female | 45    | squamous cell carcinoma | T1b  | N0 | M0 | IB             |
