# Supplementary material for: KLF14 targets ITGB1 to inhibit the progression of cervical cancer via the PI3K/AKT signalling pathway
Source: PubMed Central journal article supplement (PMC9108130; doi:10.1007/s12672-022-00494-1), 2022-05-16
Supplement: 12672_2022_494_MOESM2_ESM.pdf [file 12672_2022_494_MOESM2_ESM.pdf]

## Injection Scheme

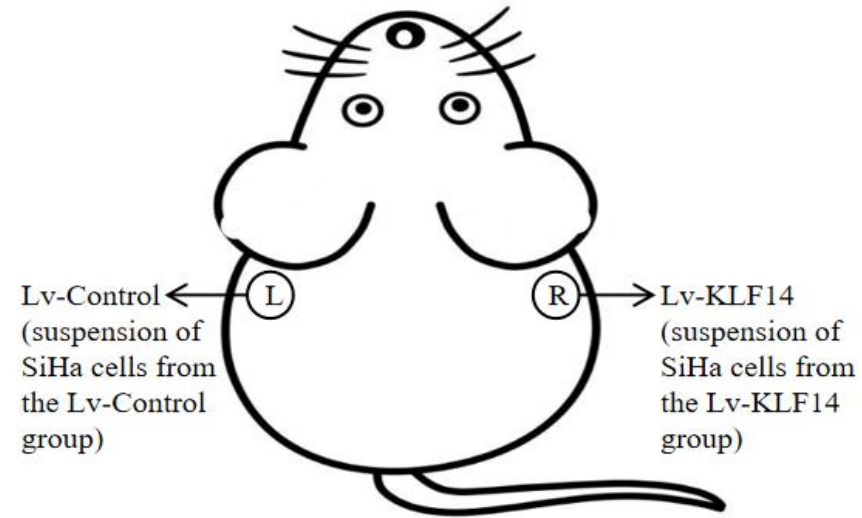

## Induction Scheme

| TIME                         | METHOD DESIGN                                                                                             | PURPOSE                                |
|------------------------------|-----------------------------------------------------------------------------------------------------------|----------------------------------------|
| Before the injection         | SiHa cells (Lv-KLF14 group and Lv-control group) were cultured in medium containing DOX (5ug/ml) for 48 h | In vitro induction of KLF14 expression |
| Within one week of injection | Dox-containing water (1mg/ml) was fed continuously.                                                       | In vivo induction of KLF14 expression  |
| After one week of injection  | Dox-containing water (1mg/ml) was fed intermittently (Reduces the damage of DOX toxicity to animals).     | In vivo induction of KLF14 expression  |
